# Supplementary material for: Predictive Binding Affinity of Plant-Derived Natural Products Towards the Protein Kinase G Enzyme of Mycobacterium tuberculosis (MtPknG)
Source: PubMed Central journal article supplement (PMC6918344; doi:10.3390/plants8110477), 2019-11-06
Supplement: plants-08-00477-s001.pdf [file plants-08-00477-s001.pdf]

Supplementary materials

# Predictive Binding Affinity of plant-Derived Natural Products Towards the Protein Kinase G Enzyme of *Mycobacterium tuberculosis* (MtPknG)

Rana M. Qasaymeh <sup>1</sup>, Dino Rotondo <sup>1</sup>, Carel B. Oosthuizen <sup>2</sup>, Namrita Lall <sup>2,3,4</sup> and Veronique Seidel <sup>1,\*</sup>

<sup>1</sup> Strathclyde Institute of Pharmacy and Biomedical Sciences, University of Strathclyde, Glasgow G4 0RE, UK; rana-mohammad-mahmoud-qasaymeh@strath.ac.uk; d.rotondo@strath.ac.uk; veronique.seidel@strath.ac.uk

<sup>2</sup> Department of Plant and Soil Sciences, University of Pretoria, Pretoria 0002, South Africa; u04405765@tuks.co.za; namrita.lall@up.ac.za;

<sup>3</sup> School of Natural Resources, University of Missouri, Columbia, MO 65211, United States

<sup>4</sup> College of Pharmacy, JSS Academy of Higher Education and Research, Mysuru, Karnataka 570015,, India.

\* Correspondence: veronique.seidel@strath.ac.uk; Tel.: +44-141-548-2751 (V.S.)

Received: 10 October 2019; Accepted: 31 October 2019; Published: date

**Table 1.** Origin of *Pelargonium* natural products and their predicted free binding energy (docking score  $\Delta G$  in kcal/mol) and ligand efficiency indices towards *MtPknG*<sup>a</sup>.

| Compound                                                    | <i>P. reniforme</i> | <i>P. sidoides</i> | Docking Score      | Ligand Efficiency Indices |      |      |
|-------------------------------------------------------------|---------------------|--------------------|--------------------|---------------------------|------|------|
|                                                             |                     |                    |                    | LE1                       | LE2  | LE3  |
| Phenolics                                                   |                     |                    |                    |                           |      |      |
| Shikimic acid 3,5-di- <i>O</i> -gallate                     | AP                  |                    | -10.7              | 0.31                      | 0.51 | 0.02 |
| ( $\alpha,\beta$ )-3,4-Di- <i>O</i> -galloylglucopyranoside | AP                  |                    | -10.6 ( $\alpha$ ) | 0.31                      | 0.53 | 0.02 |
|                                                             |                     |                    | -10.0 ( $\beta$ )  | 0.29                      | 0.50 | 0.02 |
| Salidroside-6''- <i>O</i> -gallate                          | AP                  |                    | -10.2              | 0.32                      | 0.46 | 0.02 |
| Glucogallin                                                 | AP                  | AP                 | -9.3               | 0.40                      | 0.72 | 0.03 |
| Shikimic acid 3- <i>O</i> -gallate                          | R                   | R                  | -9.1               | 0.40                      | 0.65 | 0.03 |
| <i>p</i> -coumaroyl-4- <i>O</i> - $\beta$ -D-glucoside      | AP                  |                    | -9.1               | 0.40                      | 0.61 | 0.03 |
| Gallic acid butyl ester                                     | AP                  |                    | -8.3               | 0.52                      | 0.75 | 0.04 |
| Glycerol-1-gallate                                          | AP                  |                    | -8.2               | 0.48                      | 0.82 | 0.03 |
| Caffeic acid                                                | R                   |                    | -7.6               | 0.58                      | 0.84 | 0.04 |
| Ethyle gallate                                              | AP                  | AP                 | -7.6               | 0.54                      | 0.84 | 0.04 |
| Ferulic acid                                                | R                   |                    | -7.5               | 0.54                      | 0.75 | 0.04 |
| <i>p</i> -coumaric acid                                     | R                   |                    | -7.4               | 0.62                      | 0.82 | 0.05 |
| <i>p</i> -coumaraldehyde                                    | R                   |                    | -7.0               | 0.64                      | 0.78 | 0.05 |
| Methyl gallate                                              | AP, R               | AP, R              | -6.9               | 0.53                      | 0.86 | 0.04 |
| <i>p</i> -hydroxyphenyl acetic acid                         | AP                  |                    | -6.9               | 0.63                      | 0.86 | 0.05 |
| <i>p</i> -hydroxybenzyl alcohol                             | AP                  |                    | -6.7               | 0.74                      | 0.96 | 0.05 |
| Vanillic acid                                               | R                   |                    | -6.6               | 0.55                      | 0.83 | 0.04 |
| Protocatechuic acid                                         | R                   |                    | -6.5               | 0.59                      | 0.93 | 0.04 |
| <i>p</i> -hydroxybenzoic acid                               | R                   |                    | -6.2               | 0.62                      | 0.89 | 0.04 |
| <i>p</i> -hydroxyphenyl ethanol                             | AP                  |                    | -5.8               | 0.58                      | 0.73 | 0.04 |

AP= Aerial parts; R = Roots.

LE1 defines the ligand efficiency coefficient calculated as  $-(\Delta G/\text{number of heavy atoms in the ligand})$ . LE2 defines the ligand efficiency coefficient calculated as  $-(\Delta G/\text{number of carbons in the ligand})$ . LE3 defines the ligand efficiency coefficient calculated as  $-(\Delta G/\text{molecular weight of the ligand})$ .

<sup>a</sup>The re-docked AX20017 control inhibitor had a docking score of -7.9 kcal/mol against *MtPknG* and ligand efficiencies LE1, LE2 and LE3 of 0.44, 0.61 and 0.03, respectively.

**Table 1.** (Cont.). Origin of *Pelargonium* natural products and their predicted free binding energy (docking score  $\Delta G$  in kcal/mol) and ligand efficiency indices towards MtPknG<sup>a</sup>.

| Compound                                         | <i>P.</i><br><i>reniforme</i> | <i>P.</i><br><i>sidoides</i> | Docking<br>Score | Ligand Efficiency<br>Indices |      |      |
|--------------------------------------------------|-------------------------------|------------------------------|------------------|------------------------------|------|------|
|                                                  |                               |                              |                  | LE1                          | LE2  | LE3  |
| Coumarins                                        |                               |                              |                  |                              |      |      |
| 8-hydroxy-5,7-<br>dimethoxycoumarin-6-sulfate    |                               | R                            | -8.8             | 0.42                         | 0.80 | 0.04 |
| Magnolioside                                     |                               | R                            | -8.7             | 0.35                         | 0.54 | 0.02 |
| 5,6-dimethoxycoumarin-7-sulfate                  |                               | R                            | -8.7             | 0.44                         | 0.79 | 0.04 |
| 7-hydroxycoumarin-6,8-bisulfate                  |                               | R                            | -8.7             | 0.40                         | 0.97 | 0.02 |
| 7-methoxycoumarin-6,8-bisulfate                  |                               | R                            | -8.7             | 0.38                         | 0.87 | 0.02 |
| 6-hydroxy-5,7-<br>dimethoxycoumarin-8-sulfate    |                               | R                            | -8.5             | 0.40                         | 0.77 | 0.04 |
| 7-hydroxy-5,6-<br>dimethoxycoumarin-8-sulfate    |                               | R                            | -8.4             | 0.40                         | 0.76 | 0.04 |
| 6,7-dihydroxycoumarin-8-sulfate                  |                               | R                            | -8.3             | 0.46                         | 0.92 | 0.03 |
| Isofraxoside                                     |                               | R                            | -8.3             | 0.32                         | 0.52 | 0.02 |
| 5,6,7,8-tetramethoxycoumarin<br>(Artelin)        |                               | R                            | -8.2             | 0.43                         | 0.63 | 0.03 |
| 7,8-dihydroxycoumarin-6-sulfate                  |                               | R                            | -8.2             | 0.46                         | 0.91 | 0.03 |
| 6-methoxycoumarin-7-sulfate                      |                               | R                            | -8.2             | 0.46                         | 0.82 | 0.03 |
| 8-hydroxy-7-methoxycoumarin-6-<br>sulfate        |                               | R                            | -8.1             | 0.43                         | 0.81 | 0.03 |
| 5,6-dihydroxy-7-methoxycoumarin<br>(Isofraxetin) | R                             |                              | -7.9             | 0.53                         | 0.79 | 0.04 |
| 7,8-dihydroxy-5,6-<br>dimethoxycoumarin          |                               | R                            | -7.9             | 0.46                         | 0.72 | 0.03 |
| 7-hydroxy-6-methoxycoumarin-8-<br>sulfate        |                               | R                            | -7.8             | 0.41                         | 0.78 | 0.03 |
| 8-hydroxy-5,6,7-<br>trimethoxycoumarin           | R                             | R                            | -7.7             | 0.43                         | 0.64 | 0.03 |
| 7,8-dihydroxy-6-methoxycoumarin<br>(Fraxetin)    |                               | R                            | -7.7             | 0.51                         | 0.77 | 0.04 |
| 6,7,8-trihydroxycoumarin                         | R                             | R                            | -7.7             | 0.55                         | 0.86 | 0.04 |
| 7-acetoxy-5,6-dimethoxycoumarin                  |                               | R                            | -7.6             | 0.40                         | 0.58 | 0.03 |
| 6,8-dihydroxy-7-methoxycoumarin                  |                               | R                            | -7.6             | 0.51                         | 0.76 | 0.04 |
| 8-hydroxy-6,7-dimethoxycoumarin<br>(Fraxidin)    | R                             |                              | -7.5             | 0.47                         | 0.68 | 0.03 |
| 7- hydroxy-5,6-<br>dimethoxycoumarin (Umckalin)  |                               | R                            | -7.5             | 0.47                         | 0.68 | 0.03 |
| 6,8-dihydroxy-5,7-<br>dimethoxycoumarin          |                               | R                            | -7.5             | 0.44                         | 0.68 | 0.03 |
| Umckalin-7- $\beta$ -D-glucoside                 |                               | R                            | -7.5             | 0.28                         | 0.44 | 0.02 |
| 5,6,7-trimethoxycoumarin                         |                               | R                            | -7.4             | 0.44                         | 0.62 | 0.03 |
| 6-hydroxy-5,7-dimethoxycoumarin<br>(Fraxinol)    | R                             |                              | -7.4             | 0.46                         | 0.67 | 0.03 |
| 7- hydroxy-6-methoxycoumarin<br>(Scopoletin)     | R                             | R                            | -7.3             | 0.52                         | 0.73 | 0.04 |

AP= Aerial parts; R = Roots.

---

LE1 defines the ligand efficiency coefficient calculated as  $-(\Delta G/\text{number of heavy atoms in the ligand})$ . LE2 defines the ligand efficiency coefficient calculated as  $-(\Delta G/\text{number of carbons in the ligand})$ . LE3 defines the ligand efficiency coefficient calculated as  $-(\Delta G/\text{molecular weight of the ligand})$ .

<sup>a</sup>The re-docked AX20017 control inhibitor had a docking score of -7.9 kcal/mol against *MtPknG* and ligand efficiencies LE1, LE2 and LE3 of 0.44, 0.61 and 0.03, respectively.

---

**Table 1.** (Cont.). Origin of *Pelargonium* natural products and their predicted free binding energy (docking score  $\Delta G$  in kcal/mol) and ligand efficiency indices towards *MtPknG*<sup>a</sup>

| Compound                                                | <i>P.</i><br><i>reniforme</i> | <i>P.</i><br><i>sidoides</i> | Docking<br>Score | Ligand Efficiency<br>Indices |      |      |
|---------------------------------------------------------|-------------------------------|------------------------------|------------------|------------------------------|------|------|
|                                                         |                               |                              |                  | LE1                          | LE2  | LE3  |
| Flavonoids                                              |                               |                              |                  |                              |      |      |
| Isoorientin 2''-O-gallate                               | AP                            | AP                           | -13.2            | 0.31                         | 0.47 | 0.02 |
| Isovitexin 2''-O-gallate                                |                               | AP                           | -12.6            | 0.30                         | 0.45 | 0.02 |
| Kaempferol 3-O- $\beta$ -D-rutinoside<br>(Nicotiflorin) | AP                            |                              | -12.2            | 0.29                         | 0.45 | 0.02 |
| Orientin                                                | AP                            | AP                           | -11.8            | 0.37                         | 0.56 | 0.03 |
| Kaempferol 7-O- $\beta$ -D-glucoside<br>(Populnin)      | AP                            |                              | -11.6            | 0.36                         | 0.55 | 0.03 |
| Quercetin 3-O- $\beta$ -D-rutinoside<br>(Rutin)         | AP                            |                              | -11.4            | 0.27                         | 0.42 | 0.02 |
| Quercetin 7-O- $\beta$ -D-glucoside<br>(Quercimeritrin) | AP                            |                              | -11.2            | 0.34                         | 0.53 | 0.02 |
| Isoorientin                                             | AP                            | AP                           | -11.2            | 0.35                         | 0.53 | 0.02 |
| Vitexin                                                 | AP                            | AP                           | -11.2            | 0.36                         | 0.53 | 0.03 |
| Luteolin-7-O- $\beta$ -D-glucoside<br>(Glucoluteolin)   |                               | AP                           | -11.1            | 0.35                         | 0.53 | 0.02 |
| Isovitexin                                              | AP                            | AP                           | -10.4            | 0.34                         | 0.50 | 0.02 |
| Kaempferol-3-O- $\beta$ -D-glucoside<br>(Astragalin)    | R                             |                              | -10.3            | 0.32                         | 0.49 | 0.02 |
| Myricetin                                               | R                             |                              | -10.2            | 0.44                         | 0.68 | 0.03 |
| Quercetin                                               |                               | AP                           | -9.9             | 0.45                         | 0.66 | 0.03 |
| Orientin 2''-O-gallate                                  | AP                            | AP                           | -9.9             | 0.23                         | 0.35 | 0.02 |
| Naringenin-7-O- $\beta$ -D-glucoside<br>(Prunin)        | AP                            |                              | -9.8             | 0.32                         | 0.47 | 0.02 |
| Quercetin-3-O- $\beta$ -D-glucoside<br>(Isoquercetin)   | R                             |                              | -9.8             | 0.30                         | 0.47 | 0.02 |
| Kaempferol-3-O- $\beta$ -D-galactoside<br>(Trifolin)    | R                             |                              | -9.7             | 0.30                         | 0.46 | 0.02 |
| Vitexin 2''-O-gallate                                   |                               | AP                           | -9.7             | 0.23                         | 0.35 | 0.02 |
| Taxifolin-3-O- $\beta$ -D-glucoside                     |                               | AP                           | -9.7             | 0.29                         | 0.46 | 0.02 |
| Myricetin-3-O- $\beta$ -D-glucoside<br>(Isomericitrin)  | R                             |                              | -9.4             | 0.28                         | 0.45 | 0.02 |
| Dihydrokaempferol 3-O- $\beta$ -D-<br>glucoside         |                               | AP                           | -9.2             | 0.29                         | 0.44 | 0.02 |
| Taxifolin-7-O- $\beta$ -D-glucoside                     | AP                            |                              | -9.2             | 0.28                         | 0.44 | 0.02 |
| Epigallocatechin-3-O-gallate                            |                               | AP                           | -9.2             | 0.28                         | 0.42 | 0.02 |
| Gallocatechin                                           | R                             | R                            | -8.5             | 0.39                         | 0.57 | 0.03 |
| Afzelechin                                              | R                             |                              | -8.1             | 0.41                         | 0.54 | 0.03 |
| Catechin                                                | R                             | R                            | -8.1             | 0.39                         | 0.54 | 0.03 |
| Dihydroquercetin (Taxifolin)                            | AP                            |                              | -8.0             | 0.36                         | 0.53 | 0.03 |

|                                     |    |      |      |      |      |
|-------------------------------------|----|------|------|------|------|
| Dihydrokaempferol<br>(Aromadendrin) | AP | -7.9 | 0.38 | 0.53 | 0.03 |
|-------------------------------------|----|------|------|------|------|

AP= Aerial parts; R = Roots.

LE1 defines the ligand efficiency coefficient calculated as  $-(\Delta G/\text{number of heavy atoms in the ligand})$ .  
 LE2 defines the ligand efficiency coefficient calculated as  $-(\Delta G/\text{number of carbons in the ligand})$ . LE3  
 defines the ligand efficiency coefficient calculated as  $-(\Delta G/\text{molecular weight of the ligand})$ .

<sup>a</sup>The re-docked AX20017 control inhibitor had a docking score of -7.9 kcal/mol against *MtPknG* and ligand efficiencies LE1, LE2 and LE3 of 0.44, 0.61 and 0.03, respectively.

**Table 1.** (Cont.). Origin of *Pelargonium* natural products and their predicted free binding energy (docking score  $\Delta G$  in kcal/mol) and ligand efficiency indices towards *MtPknG*<sup>a</sup>.

| Compound                                                     | <i>P.</i><br><i>reniforme</i> | <i>P.</i><br><i>sidoides</i> | Docking<br>Score | Ligand Efficiency<br>Indices |      |      |
|--------------------------------------------------------------|-------------------------------|------------------------------|------------------|------------------------------|------|------|
|                                                              |                               |                              |                  | LE1                          | LE2  | LE3  |
| <b>Miscellaneous</b>                                         |                               |                              |                  |                              |      |      |
| $\beta$ -sitosterol                                          | R                             | R                            | -10.3            | 0.34                         | 0.36 | 0.02 |
| Phyllantusiin E                                              | AP                            |                              | -10.1            | 0.48                         | 0.78 | 0.03 |
| Brevifolin carboxylic acid                                   | AP                            |                              | -10.0            | 0.48                         | 0.77 | 0.03 |
| Phyllantusiin E <i>O</i> -methyl ester                       | AP                            |                              | -9.2             | 0.42                         | 0.66 | 0.03 |
| Reniformin                                                   | R                             |                              | -9.1             | 0.27                         | 0.34 | 0.02 |
| $\beta$ -sitosterol-3- <i>O</i> - $\beta$ -D-glucoside       | R                             |                              | -8.4             | 0.20                         | 0.24 | 0.01 |
| 4,6-Dihydroxyacetophenone 2- <i>O</i> - $\beta$ -D-glucoside |                               | AP                           | -7.6             | 0.33                         | 0.54 | 0.02 |

AP= Aerial parts; R = Roots.

LE1 defines the ligand efficiency coefficient calculated as - ( $\Delta G$ /number of heavy atoms in the ligand). LE2 defines the ligand efficiency coefficient calculated as - ( $\Delta G$ /number of carbons in the ligand). LE3 defines the ligand efficiency coefficient calculated as - ( $\Delta G$ /molecular weight of the ligand).

<sup>a</sup>The re-docked AX20017 control inhibitor had a docking score of -7.9 kcal/mol against *MtPknG* and ligand efficiencies LE1, LE2 and LE3 of 0.44, 0.61 and 0.03, respectively.

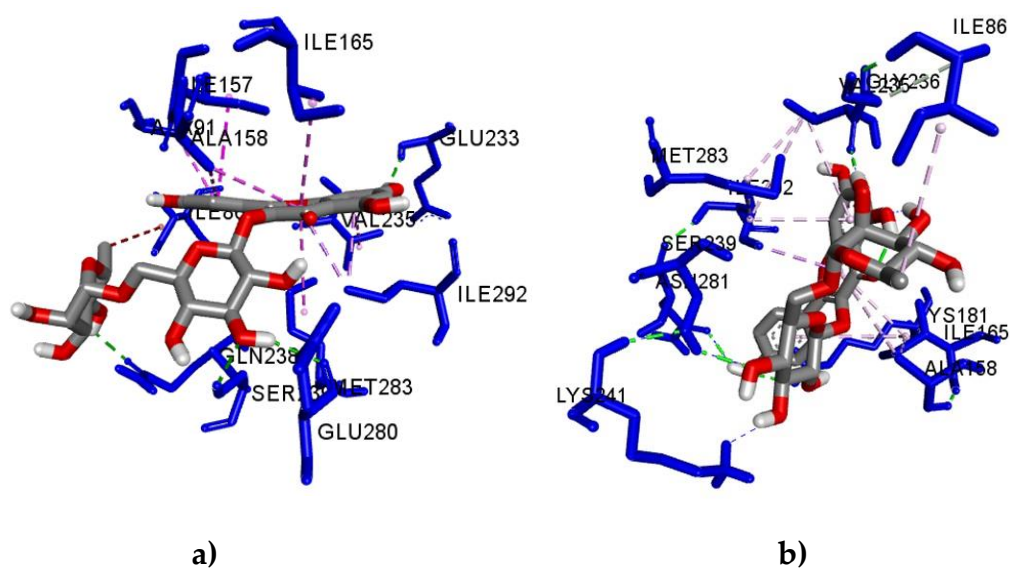

**Figure 1.** **a)** Docked pose of rigid nicotiflorin (**3**) in the *MtPknG* binding site showing molecular interactions - hydrogen-bonds as green dashed lines and hydrophobic bonds as pink/purple dashed lines- between (**3**) and *MtPknG*, generated by BIOVIA Discovery Studio visualizer. **b)** Docked pose of flexible nicotiflorin (**3**) in the *MtPknG* binding site showing molecular interactions - hydrogen-bonds as green dashed lines and hydrophobic bonds as pink/purple dashed lines- between (**3**) and *MtPknG*, generated by BIOVIA Discovery Studio visualizer.

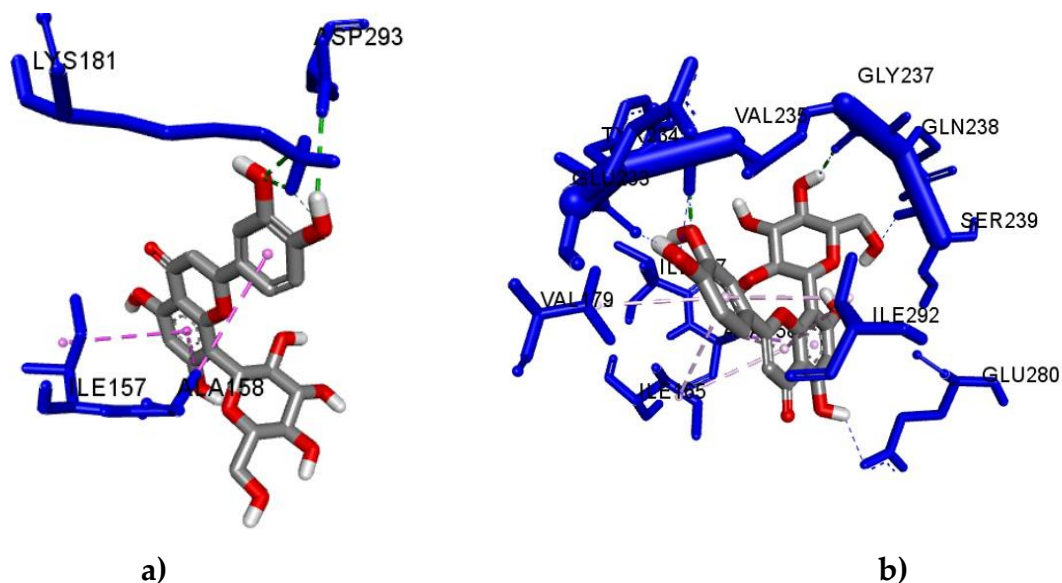

**Figure 2.** **a)** Docked pose of rigid orientin (**4**) in the *MtPknG* binding site showing molecular interactions - hydrogen-bonds as green dashed lines and hydrophobic bonds as pink/purple dashed lines- between (**4**) and *MtPknG*, generated by BIOVIA Discovery Studio visualizer. **b)** Docked pose of flexible orientin (**4**) in the *MtPknG* binding site showing molecular interactions - hydrogen-bonds as green dashed lines and hydrophobic bonds as pink/purple dashed lines- between (**4**) and *MtPknG*, generated by BIOVIA Discovery Studio visualizer.



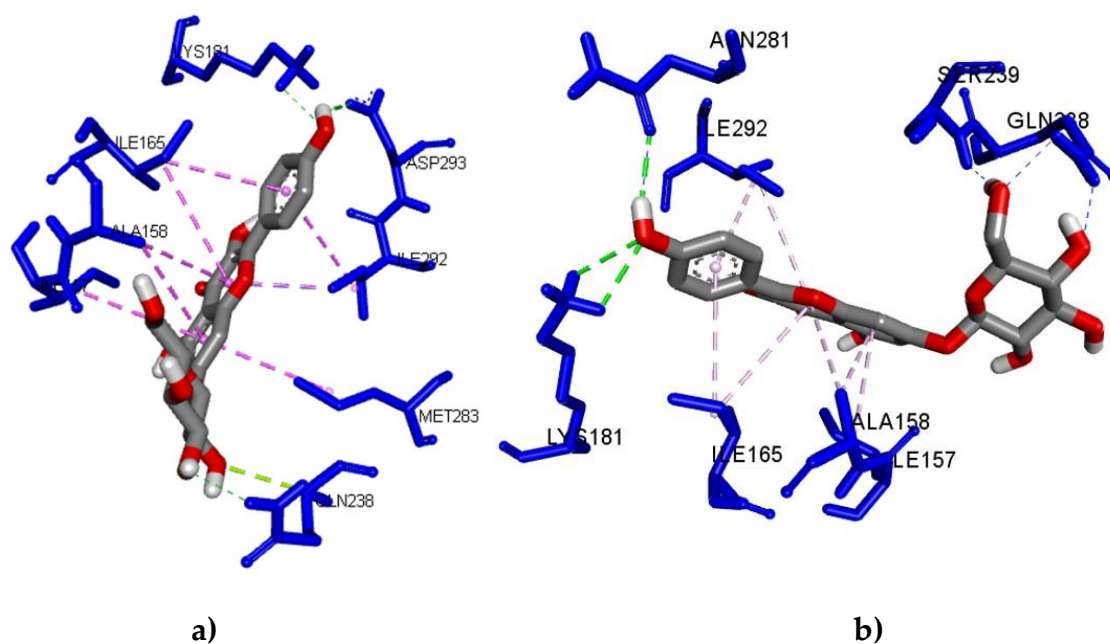

**Figure 3.** a) Docked pose of rigid populnin (5) in the *MtPknG* binding site showing molecular interactions - hydrogen-bonds as green dashed lines and hydrophobic bonds as pink/purple dashed lines- between (5) and *MtPknG*, generated by BIOVIA Discovery Studio visualizer. b) Docked pose of flexible populnin (5) in the *MtPknG* binding site showing molecular interactions - hydrogen-bonds as green dashed lines and hydrophobic bonds as pink/purple dashed lines- between (5) and *MtPknG*, generated by BIOVIA Discovery Studio visualizer.

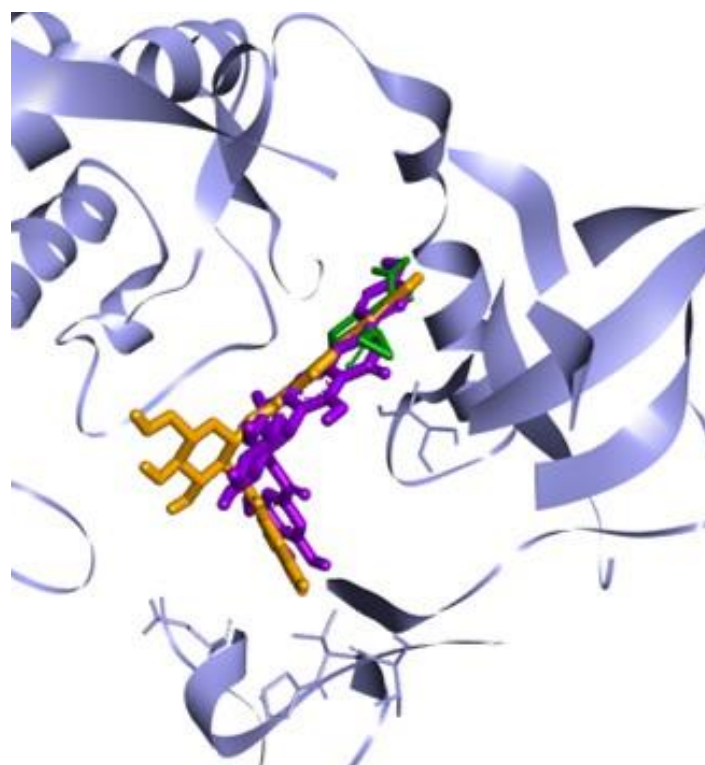

**Figure 4.** Overlay of the docked poses of the control inhibitor (green), isoorientin 2''-O-gallate (1) (yellow) and isovitexin 2''-O-gallate (2) (purple) in the *MtPknG* binding site following rigid ligand docking, generated by BIOVIA Discovery Studio visualizer.
